# Supplementary material for: Preservation of Peritoneal Dialysis in Liver Surgery with Robotic Technique: A Case Report
Source: PubMed Central journal article supplement — Case Rep Nephrol Dial. 2024 Jan 31;14(1):15–9. doi: 10.1159/000536139 (PMC10830135; doi:10.1159/000536139), 2024-01-31
Supplement: Supplementary_material-Suppl.1-s1.pdf [file Supplementary_material-Suppl.1-s1.pdf]

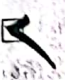

| Topic                                    | Item | Checklist item description                                                                                   | Reported on Line                                                    |
|------------------------------------------|------|--------------------------------------------------------------------------------------------------------------|---------------------------------------------------------------------|
| Key Words<br>Abstract<br>(no references) | 1    | The diagnosis or intervention of primary focus followed by the words "case report".....                      | ✓ LINES 1-2                                                         |
|                                          | 2    | 2 to 5 key words that identify diagnoses or interventions in this case report, including "case report" ...   | ✓ 16                                                                |
|                                          | 3a   | Introduction: What is unique about this case and what does it add to the scientific literature? .....        | ✓ 21 - 29                                                           |
| Introduction                             | 3b   | Main symptoms and/or important clinical findings .....                                                       | ✓ 27 - 29                                                           |
|                                          | 3c   | The main diagnoses, therapeutic interventions, and outcomes .....                                            | ✓ 27 - 38                                                           |
|                                          | 3d   | Conclusion—What is the main "take-away" lesson(s) from this case? .....                                      | ✓ 39 - 41                                                           |
| Patient Information                      | 4    | One or two paragraphs summarizing why this case is unique (may include references) .....                     | ✓ 45 - 55                                                           |
|                                          | 5a   | De-identified patient specific information.....                                                              | ✓ 59 - 69                                                           |
| Clinical Findings                        | 5b   | Primary concerns and symptoms of the patient .....                                                           | ✓ 69 - 74                                                           |
|                                          | 5c   | Medical, family, and psycho-social history including relevant genetic information .....                      | ✓ 75 - 78                                                           |
|                                          | 5d   | Relevant past interventions with outcomes .....                                                              | ✓ 69 - 71                                                           |
| Diagnostic Assessment                    | 6    | Describe significant physical examination (PE) and important clinical findings .....                         | ✓ 66 - 69 and 72-74                                                 |
|                                          | 7    | Historical and current information from this episode of care organized as a timeline .....                   | ✓ 79 - 116                                                          |
| Therapeutic Intervention                 | 8a   | Diagnostic testing (such as PE, laboratory testing, imaging, surveys) .....                                  | ✓ 69-71, 72-74, 97                                                  |
|                                          | 8b   | Diagnostic challenges (such as access to testing, financial, or cultural) .....                              | ✓ 74-77, 99, 111                                                    |
|                                          | 8c   | Diagnosis (including other diagnoses considered) .....                                                       | ✓ 69 - 74                                                           |
| Follow-up and Outcomes                   | 8d   | Prognosis (such as staging in oncology) where applicable .....                                               | ✓ 114 - 116                                                         |
|                                          | 9a   | Types of therapeutic intervention (such as pharmacologic, surgical, preventive, self-care) .....             | ✓ 79 - 113                                                          |
|                                          | 9b   | Administration of therapeutic intervention (such as dosage, strength, duration) .....                        | ✓ 106 - 113                                                         |
| Discussion                               | 9c   | Changes in therapeutic intervention (with rationale) .....                                                   | ✓ 77-78, 111-113                                                    |
|                                          | 10a  | Clinician and patient-assessed outcomes (if available) .....                                                 | ✓ 114 - 116                                                         |
|                                          | 10b  | Important follow-up diagnostic and other test results .....                                                  | ✓ 114 - 116                                                         |
| Patient Perspective                      | 10c  | Intervention adherence and tolerability (How was this assessed?) .....                                       | ✓ 94 - 98, 102-104                                                  |
|                                          | 10d  | Adverse and unanticipated events .....                                                                       | ✓ 95-98, 106-110                                                    |
|                                          | 11a  | A scientific discussion of the strengths AND limitations associated with this case report .....              | ✓ 119 - 123                                                         |
| Informed Consent                         | 11b  | Discussion of the relevant medical literature with references .....                                          | ✓ 124 - 131                                                         |
|                                          | 11c  | The scientific rationale for any conclusions (including assessment of possible causes) .....                 | ✓ 132 - 143                                                         |
| Patient Perspective                      | 11d  | The primary "take-away" lessons of this case report (without references) in a one paragraph conclusion ..... | ✓ 146 - 149                                                         |
|                                          | 12   | The patient should share their perspective in one to two paragraphs on the treatment(s) they received .....  | ✓ 76-78, 114-115                                                    |
| Informed Consent                         | 13   | Did the patient give informed consent? Please provide if requested .....                                     | Yes <input checked="" type="checkbox"/> No <input type="checkbox"/> |
